# Supplementary material
Source: publisher figshare collection journal article supplement (https://acs.figshare.com/ndownloader/files/4008502)
Supplement: Supplementary file 1 [file 4008502]

**Supporting Information**

**Resonance Stabilized Perfluorinated Ionomers for Alkaline  
Membrane Fuel Cells**

**Dae Sik Kim,<sup>a</sup> Cy H. Fujimoto,<sup>b</sup> Michael R. Hibbs,<sup>b</sup> Andrea Labouriau,<sup>a</sup> Yoong-Kee Choe,<sup>c</sup> and Yu  
Seung Kim<sup>\*a</sup>**

## 1. FT-IR Spectrum of 1,1,3,3 Tetramethyl Guanidinium

1,1,3,3 tetramethylguanidine (TMG) (Acros Organics) was dissolved in water (1 M). A drop of this solution was deposited and dried on an IR sample cartridge to measure FT-IR. Resonance stabilized single  $\text{CN}_3$  peak appeared at  $1596\text{ cm}^{-1}$ .

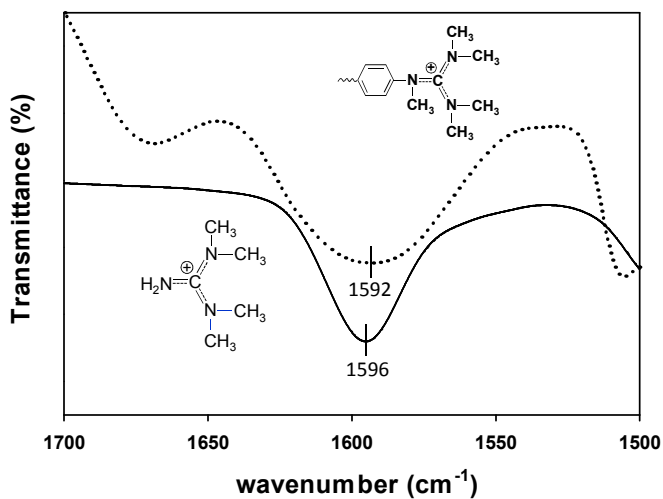

**Figure S1.** FT-IR Spectrum of 1,1,3,3 Tetramethyl Guanidinium (solid line) and Phenyl Pentamethyl Guanidinium (dotted line).

## 2. $^1\text{H}$ -NMR of M-Nafion-FA-TMG

Figure S2 shows the  $^1\text{H}$ -NMR of M-Nafion-FA-TMG. TMG attachment and methylation yields were calculated from the integration ratio of protons of amide group (4.25 ppm, 1H), guanidinium (3.1-3.2 ppm-TMG, 12H), and methyl group (2.8-2.9 ppm, 3H).

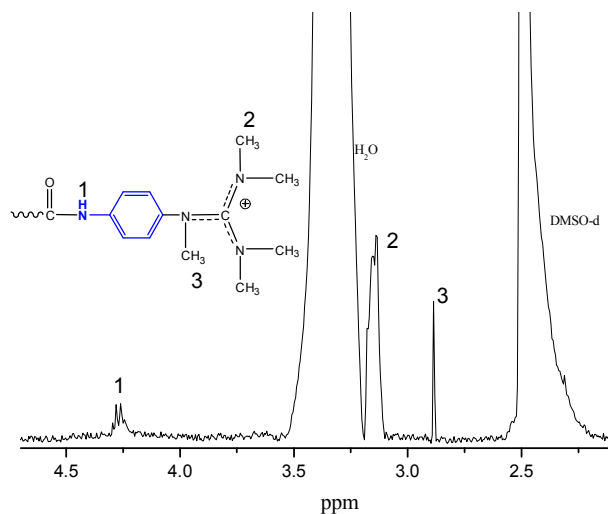

**Figure S2.**  $^1\text{H}$ -NMR of M-Nafion-FA-TMG

3.  $^{13}\text{C}$ -NMR of M-Nafion-TMG before and after NaOH treatment (0.5 M NaOH for 24 h)

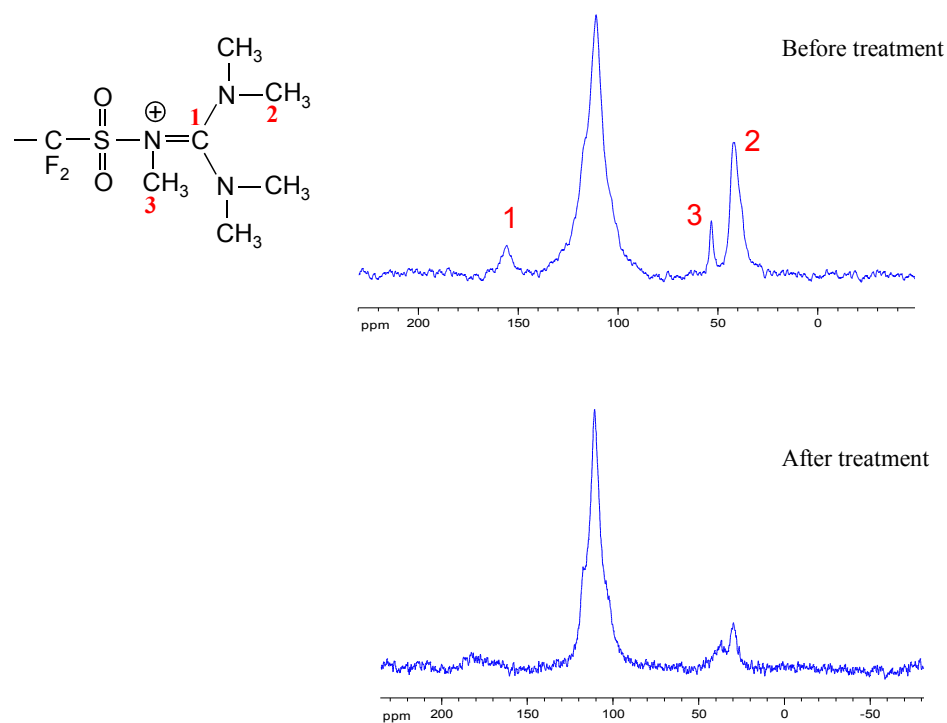

**Figure S3.**  $^{13}\text{C}$ -NMR of M-Nafion-TMG before and after NaOH treatment

#### 4. Barrier energy comparison of central carbon degradation for sulfone- and phenyl-guanidinium.

The central carbon degradation of sulfone- and phenyl-guanidinium is compared. The energy barrier of sulfone guanidinium degradation is 2.0 kcal/mol while corresponding value of phenyl guanidinium is 23.8 kcal/mol, indicating better stability of phenyl guanidinium with respect to the attack of OH<sup>-</sup>. The degradation of sulfone guanidinium may occur in a step-wise manner, while that of phenyl guanidinium occurs in a concerted fashion. In reactant state, the bond length of C-N<sub>L</sub> in M-Nafion-FA-TMG is computed to be 1.47 Å while that of M-Nafion-TMG is computed to be 1.53 Å, suggesting the more robust nature of the former.

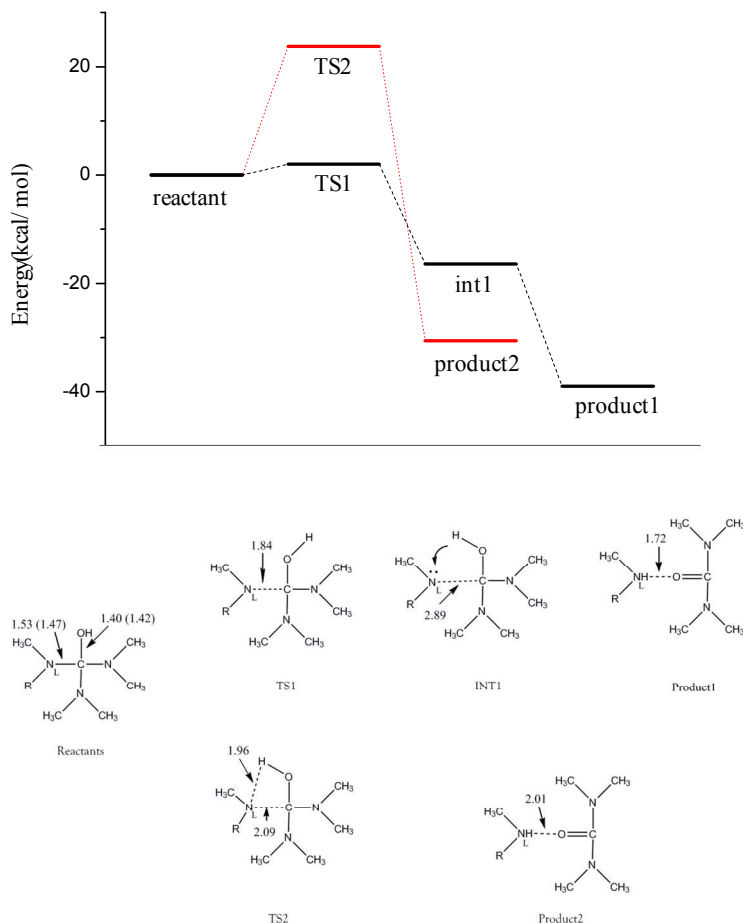

**Figure S4.** Energy profiles of the guanidinium degradation reactions caused by OH<sup>-</sup>. The redline corresponds to the profile for phenyl guanidinium. Molecular structures of stationary points along the reaction coordinate. Some geometrical parameters [distances in Å] are shown. Given in parenthesis are values of phenyl guanidinium.
